# Supplementary material
Source: PubMed Central journal article supplement (PMC3932136)
Supplement: NIHMS551496-supplement-1.pdf [file NIHMS551496-supplement-1.pdf]

# Islet antigen-specific Th17 cells can induce TNF $\alpha$ -dependent autoimmune diabetes

Cheng-Rui Li\*, Erin E Mueller\*, and Linda M Bradley\*

\*Infectious and Inflammatory Disease Center, Sanford Burnham Medical Research Institute, La Jolla, CA 92037, USA

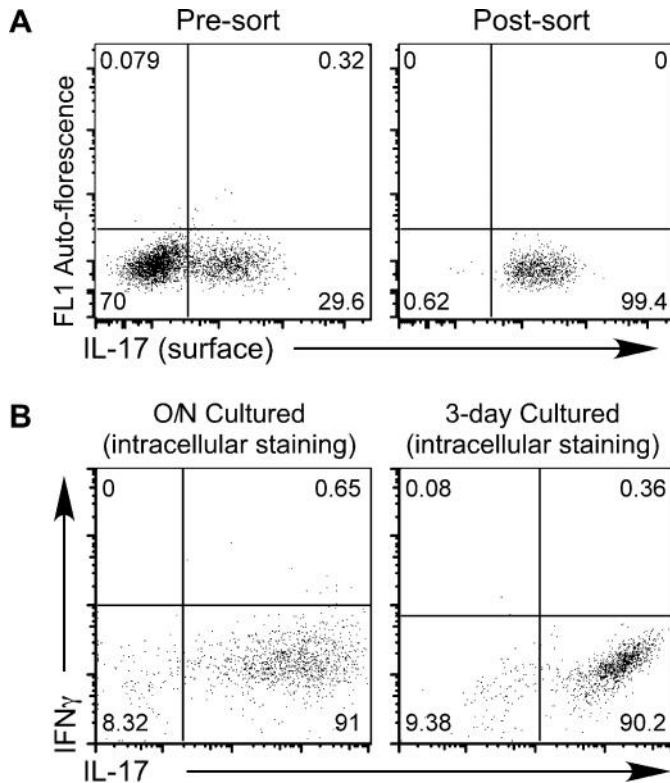

**Supplemental Figure 1. Purification of Th17 cells by surface IL-17 staining and FACS sorting.**

(A) CD4<sup>+</sup> T cells were activated under Th17 differentiation conditions. After 5 days of differentiation culture, cells were harvested and cultured in complete RPMI medium without further stimulation for 2 days (resting). Cells were restimulated with PMA and Ionomycin without Brefeldin A for 3 hours and stained for surface CD4 and IL-17 (left panel). CD4<sup>+</sup>IL-17<sup>surface+</sup> cells were sorted by FACS (right panel). (B) Sorted CD4<sup>+</sup>IL-17<sup>surface+</sup> cells were cultured in complete RPMI medium without any stimulation. At different time points, cells were analyzed for the expression of IL-17 and IFN $\gamma$  by intracellular staining and FACS, after restimulation with PMA, Ionomycin, and Brefeldin A (or GolgiPlug<sup>TM</sup>). Shown are representative IL-17 and IFN $\gamma$  staining of over-night (O/N, left panel) and 3-day (right panel) cultured cells.
